1 Title: Mega- and meta-analyses of fecal metagenomic studies assessing response to immune checkpoint inhibitors

2  
3 Authors: Alya Heirali<sup>1, \*</sup>, Bo Chen<sup>2, \*</sup>, Matthew Wong<sup>1</sup>, Pierre HH Schneeberger<sup>1</sup>, Victor Rey<sup>1</sup>, Anna Spreafico<sup>2,3</sup>, Wei Xu<sup>2,4, #</sup>, Bryan  
4 A. Coburn<sup>1,5, #</sup>

5  
6 Institutions:

- 7  
8 1. Toronto General Hospital Research Institute, University Health Network, Toronto, Canada.  
9 2. Princess Margaret Cancer Centre, Toronto, Canada.  
10 3. Department of Medicine, Division of Medical Oncology and Hematology, University of Toronto, Toronto, Canada.  
11 4. Dalla Lana School of Public Health, University of Toronto, Toronto, Canada.  
12 5. Department of Medicine, Division of Infectious Diseases, University of Toronto, Toronto, Canada.

13  
14 \* Equally contributed

15  
16 # Corresponding authors:

17 Bryan Coburn  
18 bryan.coburn@utoronto.ca  
19 University Health Network  
20 101 College St., Rm 10-358  
21 Toronto, Ontario, M5G 1L7

22  
23 Wei Xu  
24 wei.xu@uhnresearch.ca  
25 Princess Margaret Cancer Centre  
26 610 University Ave., Rm 10-511  
27 Toronto, Ontario, M5G 2M9

28  
29 Running title: Meta/mega analysis of fecal metagenomics and response to ICI

30  
31 Keywords: Immune checkpoint inhibitors, programmed cell death protein 1, gut microbiome, RECIST response, biomarkers  
32

33 **Abstract**

34 Purpose: Gut microbiota have been associated with response to immune checkpoint inhibitors (ICI) including anti-PD-1 and anti-  
35 CTLA-4 antibodies. However, inter-study difference in design, patient cohorts and data analysis pose challenges to identifying species  
36 consistently associated with response to ICI or lack thereof.

37 Experimental Design: We uniformly processed and analyzed data from three studies of microbial metagenomes in cancer  
38 immunotherapy response (four distinct data sets) to identify species consistently associated with response or non-response (n=190  
39 patient samples). Metagenomic data were processed and analyzed using Metaphlan v2.0. Meta- and mega-analyses were performed  
40 using a two-part modelling approach of species present in at least 20% of samples to account for both prevalence and relative  
41 abundance differences between responders/non-responders.

42 Results: Meta- and mega-analyses identified five species that were concordantly significantly different between responders and non-  
43 responders. Amongst them, *Bacteroides thetaiotaomicron* and *Clostridium bolteae* relative abundance (RA) were independently  
44 predictive of non-response to immunotherapy when data sets were combined and analyzed using mega-analyses (AUC 0.59 95% CI  
45 0.51-0.68 and AUC 0.61 95% CI 0.52-0.69, respectively).

46 Conclusions: Meta- and mega-analysis of published metagenomic studies identified bacterial species both positively and negatively  
47 associated with immunotherapy responsiveness across four published cohorts.

48

## 49 **Introduction**

50  
51 A number of studies have demonstrated the gut microbiome is associated with response to immune checkpoint inhibitors (ICI)<sup>1-5</sup>.  
52 Anti-programmed cell death protein 1 (PD-1) and anti-cytotoxic T lymphocyte-associated protein 4 (CTLA-4) targeting agents  
53 derepress anti-tumor T-cells. In the past five years, mouse models and human observational cohort studies have shown that the gut  
54 microbiome of responders to ICI is compositionally different from non-responders<sup>1-6</sup>. However, inter-study differences in taxa  
55 associated with response to ICIs make it challenging to discern which organisms are consistently associated with response or non-  
56 response across studies and different cancers. This variability may in part be due to differences in sequence analytical pipelines.  
57 We conducted both meta- and mega-analyses of metagenomic studies of the gut microbiome in ICI recipients to determine species  
58 consistently enriched/depleted in responders compared to non-responders. Here, metagenomic data were selected to maximize the  
59 taxonomic resolution and delineate species-specific associations that may not be evident when taxa are annotated at the genus level.

## 60 **Methods**

### 61 **Cohort Inclusion**

62 We included three studies with publicly available metagenomic data and meta-data. Data was further divided into distinct data sets for  
63 the Routy *et al.* study to assess differences based on tumor type. These data sets include individuals with melanoma, renal cell  
64 carcinoma (RCC) and non-small cell lung cancer (NSCLC).

### 65 **Definitions**

66 Patients were classified as responders (R) or non-responders (NR) using the response evaluation criteria in solid tumors across all  
67 three studies (RECIST v1.1)<sup>3-5,7</sup>. Data sets were analyzed in aggregate (meta/mega analysis) and separately. The primary outcome of

68 interest was to detect species consistently enriched/depleted in responders to ICI across data sets. This was achieved using a number of  
69 statistical methods described below. The secondary outcome was to identify predictors of response using receiver operator  
70 characteristics area under the curve (ROCAUC) analyses.

### 71 **Microbiome Data processing**

72 Raw sequencing data were obtained, and quality filtered using FastQC and MultiQC<sup>8,9</sup>. Metaphlan v2.0 was used for its fast and  
73 robust species level annotation of microbial genomes<sup>10</sup>. Alpha-diversity measures were calculated using Phyloseq<sup>11</sup>. Statistical  
74 analyses and data visualization were conducted in R and Prism<sup>12,13</sup>.

### 75 **Statistical Analyses**

#### 76 *Two-part log-normal model*

77 The raw sequencing data was observed as relative abundance (RA) of each species. Our target was to estimate the R/NR group  
78 differences of each species, where the differences consist of both species prevalence (presence/absence) and magnitude of abundance  
79 when species are present. We conducted two-part model analysis for species prevalence and relative abundance separately.  
80 Specifically, we used a logistic regression model to detect the association between species prevalence and R/NR. For RA data greater  
81 than zero, we observed log-normal distributions, and thus used linear regression model to find its association to R/NR group.

82 The logistic regression estimates (effect size) represent the log odds ratio of species prevalence between R and NR group, and linear  
83 regression estimates (effect size) represent the change of mean RA between R and NR group after excluding all zeros. We calculated  
84 95% confidence intervals (CIs) for all estimates and tested if each estimate is significantly different from 0. A positive estimate means  
85 that R had a higher proportion of non-zeros among all samples, or R had a higher RA on average compared to NR. We noted that for

86 each species, estimates for prevalence and abundance may have different directions, which is described as “dissonant” effect<sup>14</sup>. In  
87 order not to let the opposite estimates reduce statistical test power, we tested each estimate by chi-squared test without considering its  
88 direction. We then combined these two test statistics to achieve the overall p-value, which tests the overall difference between R and  
89 NR for each species.

#### 90 *Meta-analysis*

91 Meta-analysis is a two-stage approach<sup>15</sup>. In the initial stage data are analyzed separately for each study. In the second-stage test results  
92 for each study are aggregated to obtain summary data across all studies<sup>15</sup>. On the other hand, mega-analysis is a one-stage approach  
93 that pools and analyzes raw data from a number of studies to estimate the overall effect<sup>15</sup>. Both approaches have their strengths and  
94 limitations<sup>15</sup>. We conducted a meta-analysis by combining the test results for each of the four data sets in Table 1. Logistic regression  
95 and linear regression estimates are only accurate if the zero proportion in each species is sufficiently low. Accordingly, species were  
96 excluded if their prevalence was lower than 20%. As species prevalence differs by study, some species were filtered out only in a  
97 subset of the data sets. Assuming the independence of each data set, the overall meta-analysis p-values were computed for the  
98 combined test statistic, which is the sum of the test statistics from the four data sets.

#### 99 *Mega-analysis*

100 For each species included in the meta-analysis, we also conducted a mega-analysis. The mega-analysis simply combined all samples  
101 from all four data sets, and two-part log-normal models were implemented similarly. We also calculated the CIs for all estimates and  
102 overall chi-squared test p-values combining species prevalence and abundance, which were then compared with the meta-analysis  
103 results.

104 **Results**

105 **Characteristics of cohorts included in analyses**

106 In this mega- and meta-analysis, we included three studies that assessed fecal metagenomics of R and NR to ICI in patients with  
107 varying tumor types (Table 1). Data from Routy *et al.*, was analyzed as subsets based on tumor type RCC vs advanced NSCLC for a  
108 total of 4 analyzed cohorts. DNA extraction, sequencing platform and sequencing depth varied by study and are summarized in Table  
109 S1. A total of 190 patients (n=103 R; n=87 NR) were included from the three studies.

110 A total of 469 species were identified across all four data sets of which 167 species met our inclusion criteria of being present in >20%  
111 of samples and were included in the two-part log-normal analysis (Table S2). A total of 34 species were differentially abundant based  
112 on response in at least one dataset or mega- and meta-analyses (Table S2).

113

114 **Table 1:** Characteristics of cohorts included in meta-analysis and corresponding taxa associated with response to ICI using  
 115 metagenomic analyses.  
 116

| Patient population  | N (= total number of patients) | Responders | non-Responders | Organisms enriched in RECIST responders                                                                                                                                                                                                                                                                                                          | Organism Enriched in RECIST non-responders                                                                                         | Reference                         |
|---------------------|--------------------------------|------------|----------------|--------------------------------------------------------------------------------------------------------------------------------------------------------------------------------------------------------------------------------------------------------------------------------------------------------------------------------------------------|------------------------------------------------------------------------------------------------------------------------------------|-----------------------------------|
| Metastatic melanoma | N=25                           | N=14       | N=11           | <i>Faecalibacterium spp.</i>                                                                                                                                                                                                                                                                                                                     | <i>Bacteroides thetaiotaomicron, Escherichia coli, Anaerotruncus colihominis</i>                                                   | Gopalakrishnan <i>et al.</i> 2018 |
| Metastatic melanoma | N=38                           | N=14       | N=24           | <i>Enterococcus faecalis, E. coli, Escherichia spp., Bacteroides ovatus, Turicibacter sanguinis, Clostridium nexile, Enterococcus faecium, Collinsella aerofaciens, Bifidobacterium adolescentis, Klebsiella oxytoca, Veillonella parvula, Parabacteroides merdae, Lactobacillus species, and Bifidobacterium longum, Campylobacter gracilis</i> | <i>Burkholderiales bacterium 1147, Holdemania filiformis, Coprococcus comes</i>                                                    | Matson <i>et al.</i> 2018         |
| Advanced NSCLC      | N=65                           | N=33       | N=32           | <i>Akkermansia muciniphila, Ruminococcaceae, Faecalibacterium, Alistipes spp., Eubacterium species, Firmicutes, Cloacibacilius porcorum, Enterococcus faecium, Clostridiales, Firmicutes, Prevotella,</i>                                                                                                                                        | <i>Prevotella spp., Clostridiales, Blautia, Bacteroides calrus, Proteobacteria, Bacteroides nordii, Parabacteroides distasonis</i> | Routy <i>et al.</i> 2018          |
| RCC                 | N=62                           | N=42       | N=20           |                                                                                                                                                                                                                                                                                                                                                  |                                                                                                                                    |                                   |

117

118 **Species consistently enriched or depleted in responders compared to non-responders across data sets**

119 The primary goal for our study was to determine species consistently enriched or depleted in R compared to NR across data sets.  
120 While each data set had unique signatures of differentially abundant species between R/NR, no species were identified that were  
121 statistically significantly associated with response across all four data sets. A number of species were significantly differentially  
122 enriched/depleted in R/NR per data set; Matson et al., (n=7 species), Routy et al., (RCC) (n=6), Routy et al., (NSCLC) (n=10),  
123 Gopalakrishnan et al., (n=9) (Figures S1 and S2 and Table S2). A total of three species were significantly enriched or depleted in R in  
124 two data sets: *Clostridiaceae bacterium JC118* was enriched in R in the Routy et al., (NSCLC) and Matson et al., data sets;  
125 *Bacteroides thetaiotaomicron* RA was significantly depleted in R in both the Routy et al., (RCC) and Gopalakrishnan et al., data sets;  
126 and an increase in *Lachnospiraceae bacterium 5163FAA* abundance was associated with response in both the Gopalakrishnan et al.,  
127 and Routy et al., (NSCLC) data sets. While not significantly different, *Streptococcus australis* trended towards a higher relative  
128 abundance in R across all cohorts. In contrast, *B. thetaiotaomicron* trended towards lower relative abundance in R across all data sets.  
129 In addition, we were interested in assessing species that are consistently enriched or depleted in R across data sets based on prevalence  
130 (Figure S2 and Table S2). *Clostridium bolteae*, *Escherichia coli*, *Flavonifractor plautii*, *Ruminococcus lactaris* and *Streptococcus*  
131 *australis* were consistently less prevalent in R. In contrast, *Bacteroides caccae*, *Barnesiella intestinihominis* and *Lachnospiraceae*  
132 *bacterium 8157FAA* were more prevalent in R. Only one species had statistically significant but opposing associations between  
133 cohorts; *Ruminococcus gnavus* was more abundant in R in the Routy et al., (RCC) cohort and less abundant in the cohort in the  
134 Gopalakrishnan et al., study.



135 **Meta-analysis reveals species consistently associated with response to immunotherapy**

136 A summary of a metagenomic meta-analysis of species level ICI response associations is shown in Figure 1. A total of thirteen species  
137 were significantly differentially abundant between R and NR in the meta-analysis. Of these thirteen species, twelve were identified as  
138 significantly different between R and NR in at least one data set on its own. *Clostridium hathewayi* was the only species identified  
139 uniquely in the meta-analysis. Five species which were significantly associated with R/NR in one dataset demonstrated a non-  
140 significant trend in the meta-analysis: *Coprobacillus spp*, *Parabacteroides spp.*, Lachnospiraceae bacterium 8157FAA, *Eubacterium*  
141 *ramulus*, and *Clostridium symbiosum*. Lastly, 16 species were not statistically significantly different nor trended towards response  
142 using the meta-analysis despite being significantly different in at least one dataset.

Species

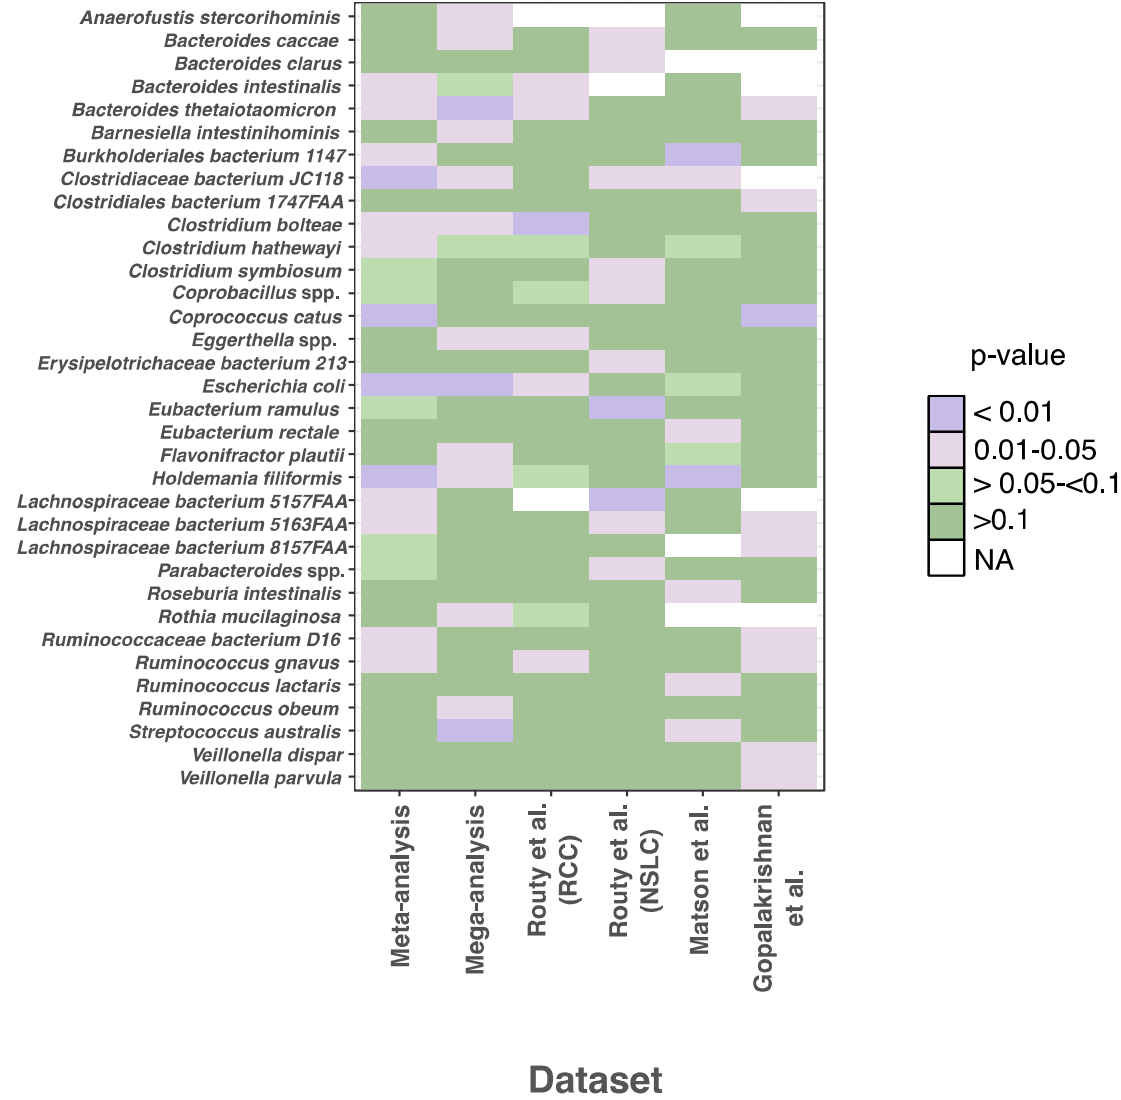

Dataset

144 **Figure 1:** Taxa that are significantly different between responders and non-responders in at least one dataset and or mega/meta-  
145 analyses using a two-part log-normal analysis accounting for both taxa abundance and prevalence.  
146

147 **Mega-analysis assessing differences in responders vs non-responders across all data sets**

148 Mega-analysis allowed us to determine the effect size of the differences between R and NR for both prevalence and relative  
149 abundance of species across all studies (Figures S1 and S2, and Table S2). In the mega-analysis, thirteen species were statistically  
150 differentially abundant between R and NR (Figure 1). Of these thirteen species, eight were associated with response in at least one  
151 dataset. Five species were uniquely associated with response using the mega-analysis including *Anaerofustis stercorihominis*,  
152 *Flavonifractor plautti*, *Ruminococcus obeum*, *Rothia mucilaginosa* and *Barnesiella intestinitominis*. Of the 34 species associated with  
153 response in at least one data set or the meta-analysis, 19 species were not associated with response in the mega-analysis.

154 **Identification of species consistently associated with response in meta- and mega-analyses and analysis of sensitivity and**  
155 **specificity to predict response**

156 We next identified species that were concordantly associated with response in both the meta and mega-analyses. Using this criterion  
157 five species were identified including *B. thetaiotaomicron*, *Clostridium bolteae*, *H. filiformis*, *Clostridiaceae bacterium JC118* and *E.*  
158 *coli*. We tested the sensitivity and specificity of the relative abundance of these five organisms and alpha-diversity measures to predict  
159 response to ICI using a ROCAUC analyses (Table 2). Our findings demonstrate inter-study differences in the ability to discriminate R  
160 vs NR based on species RA. No species or alpha-diversity metric consistently demonstrated a significant AUC across studies.  
161 However, each dataset had at least two species or alpha-diversity measures with AUC's >0.60. In the Matson et al., dataset *H.*  
162 *filiformis* RA significantly discriminated between R/NR with an AUC of 0.72 [95% CI 0.55-0.88]. *C. bolteae* RA had a significant  
163 AUC of 0.73 [95% CI 0.60-0.87] in the Routy et al., (RCC) dataset suggesting that a higher RA of this species discriminates between

164 R and NR. In the Gopalakrishnan et al., dataset both *E. coli* and *B. thetaiotaomicron* RA had significant sensitivity and specificity to  
165 detect response. When all four cohorts were combined sensitivity and specificity of predicting response were significant for the RA of  
166 both *C. bolteae* and *B. thetaiotaomicron*. SDI did not discriminate between R/NR.

167 **Table 2:** Receiver operator characteristic curve area under the curve (AUC) analysis between responders and non-responders for core  
 168 taxa and alpha-diversity measures.  
 169

| <b>Study</b>                                |            |                       |                           |                |
|---------------------------------------------|------------|-----------------------|---------------------------|----------------|
| <b>Matson <i>et al.</i>, (n=38 samples)</b> | <b>AUC</b> | <b>SE<sup>^</sup></b> | <b>95% CI<sup>+</sup></b> | <b>P-value</b> |
| SDI <sup>†</sup>                            | 0.52       | 0.10                  | 0.33-0.72                 | 0.81           |
| SIM <sup>‡</sup>                            | 0.55       | 0.10                  | 0.35-0.74                 | 0.63           |
| <i>Escherichia coli</i>                     | 0.64       | 0.10                  | 0.44-0.84                 | 0.15           |
| <i>Clostridiaceae bacterium JC118</i>       | 0.63       | 0.10                  | 0.43-0.82                 | 0.19           |
| <i>Holdemania filiformis</i>                | 0.72       | 0.085                 | 0.55-0.88                 | <b>0.027</b>   |
| <i>Clostridium bolteae</i>                  | 0.57       | 0.097                 | 0.39-0.76                 | 0.45           |
| <i>Bacteroides thetaiotaomicron</i>         | 0.61       | 0.092                 | 0.43-0.79                 | 0.25           |
| <b>Routy <i>et al.</i>, (RCC, n=62)</b>     |            |                       |                           |                |
| SDI                                         | 0.51       | 0.080                 | 0.35-0.67                 | 0.88           |
| SIM                                         | 0.53       | 0.079                 | 0.37-0.68                 | 0.74           |
| <i>Escherichia coli</i>                     | 0.54       | 0.075                 | 0.40-0.69                 | 0.58           |
| <i>Clostridiaceae bacterium JC118</i>       | 0.63       | 0.077                 | 0.47-0.78                 | 0.11           |
| <i>Holdemania filiformis</i>                | 0.53       | 0.086                 | 0.36-0.69                 | 0.76           |
| <i>Clostridium bolteae</i>                  | 0.73       | 0.070                 | 0.60-0.87                 | <b>0.0030</b>  |
| <i>Bacteroides thetaiotaomicron</i>         | 0.55       | 0.090                 | 0.37-0.72                 | 0.55           |
| <b>Routy <i>et al.</i>, (NSCLC, n=65)</b>   |            |                       |                           |                |
| SDI                                         | 0.62       | 0.071                 | 0.48-0.76                 | 0.096          |
| SIM                                         | 0.61       | 0.071                 | 0.47-0.75                 | 0.13           |
| <i>Escherichia coli</i>                     | 0.56       | 0.072                 | 0.42-0.71                 | 0.37           |
| <i>Clostridiaceae bacterium JC118</i>       | 0.58       | 0.071                 | 0.44-0.72                 | 0.28           |
| <i>Holdemania filiformis</i>                | 0.50       | 0.072                 | 0.36-0.64                 | 0.97           |
| <i>Clostridium bolteae</i>                  | 0.52       | 0.073                 | 0.37-0.66                 | 0.81           |
| <i>Bacteroides thetaiotaomicron</i>         | 0.57       | 0.072                 | 0.43-0.71                 | 0.33           |

| <b>Gopalakrishnan et al., (n=25)</b>  |      |       |           |              |
|---------------------------------------|------|-------|-----------|--------------|
| SDI                                   | 0.55 | 0.13  | 0.30-0.79 | 0.70         |
| SIM                                   | 0.64 | 0.12  | 0.41-0.88 | 0.25         |
| <i>Escherichia coli</i>               | 0.73 | 0.11  | 0.52-0.93 | <b>0.055</b> |
| <i>Clostridiaceae bacterium JC118</i> | 0.50 | 0.12  | 0.27-0.74 | 0.98         |
| <i>Holdemania filiformis</i>          | 0.55 | 0.13  | 0.31-0.81 | 0.64         |
| <i>Clostridium bolteae</i>            | 0.63 | 0.12  | 0.40-0.86 | 0.27         |
| <i>Bacteroides thetaiotaomicron</i>   | 0.76 | 0.10  | 0.55-0.96 | <b>0.029</b> |
| <b>Mega-analysis (n=190)</b>          |      |       |           |              |
| SDI                                   | 0.56 | 0.042 | 0.47-0.64 | 0.18         |
| SIM                                   | 0.55 | 0.042 | 0.46-0.63 | 0.28         |
| <i>Escherichia coli</i>               | 0.53 | 0.042 | 0.45-0.62 | 0.44         |
| <i>Clostridiaceae bacterium JC118</i> | 0.54 | 0.042 | 0.46-0.62 | 0.33         |
| <i>Holdemania filiformis</i>          | 0.54 | 0.043 | 0.46-0.63 | 0.27         |
| <i>Clostridium bolteae</i>            | 0.61 | 0.041 | 0.52-0.69 | <b>0.013</b> |
| <i>Bacteroides thetaiotaomicron</i>   | 0.59 | 0.043 | 0.51-0.68 | <b>0.027</b> |

170 † Shannon alpha-diversity index  
 171 ‡ Simpson alpha-diversity index  
 172 ^ Standard Error  
 173 + Confidence Interval  
 174

175 **Discussion**

176 In our study, we leveraged the additional statistical power of mega and meta-analyses and taxonomic resolution of metagenomic data  
177 to identify species consistently associated with R or NR across three studies (four cohorts) in which gut microbial community  
178 composition has been previously associated with response to ICI<sup>3-5</sup>. We conducted a two-part log-normal analysis that accounts for  
179 the skewness and non-Gaussian distribution of microbiome data<sup>14,16-18</sup>. Compared to simply assessing changes in relative abundance  
180 of species, this approach has the advantage of accounting for both prevalence and relative abundance data<sup>14,16-18</sup>. After uniform  
181 bioinformatic analysis, no species were identified that had a significant association with response across individual studies, but five  
182 were identified in combined analysis. Importantly, these associations were identified in spite of the inter-cohort heterogeneity in tumor  
183 type, treatment regimens, geographic location and sequencing methods, suggesting that they may be more generalizable.  
184 Our study confirms findings of some previously identified R/NR associated species<sup>2-5,19</sup>. Notably, a higher abundance of *Bacteroides*  
185 has been associated with lack of response whereas a higher abundance of *Firmicutes* has been associated with response to ICI.  
186 Specifically, we observed R had a higher abundance of *Clostridiaceae bacterium JC118* and *E. coli* and a lower abundance of *B.*  
187 *thetaitaomicron*, *H. filiformis* and *C. bolteae* compared to NR. In addition, we demonstrate that of the five organisms that were  
188 concordantly associated with response in the meta and mega-analyses, a higher relative abundance of *B. thetaitaomicron* and *C.*  
189 *bolteae* were predictive of NR using a ROCAUC analyses. These data suggest that strategies that deplete non-response associated  
190 microbes (such as specific antibiotics or bacteriophages) may be viable therapeutic approaches. This is in contrasts to “pro-microbial”



191 approaches currently being investigated in many clinical trials such as the use of probiotics, fecal microbiome transplants and stool  
192 substituents to augment response to ICI<sup>20</sup>.

193 We observed a number of discrepancies to previously published data. Of interest, *A. muciniphila*, *B. longum* and *F. prausnitzii* were  
194 associated with response in the original studies however we did not detect differences between R and NR in our analyses. While  
195 limitations in statistical power based on sample size may partly explain this, inter-cohort variability in treatment regimens and the  
196 biology of host-treatment-microbe interactions may be important additional factors. As the mechanisms conferring microbe-induced  
197 ICI-responsiveness are being elucidated, it is clear that some will be tumor-type, host or even tumor-specific, such as the molecular  
198 mimicry of tumor antigens in gut microbes<sup>21</sup>, which will only confer microbe-response associations in a defined number of patients  
199 with specific tumors. Other factors, such as diet-microbe-metabolite-immune interactions may also drive tumor, host or population-  
200 specific associations which do not generalize<sup>6</sup>.

201 We acknowledge a number of limitations to our study. Firstly, differences in sample collection, DNA extraction methods and  
202 sequencing platforms from each study may bias findings- making it challenging to detect universal signals associated with response to  
203 ICI. Implementing standardized methods for microbiome studies will reduce experimental and technical biases and improve our  
204 ability to detect differences between R and NR. Second, patient heterogeneity in disease stage, diet, sex, treatment, co-morbidities  
205 limit the ability of meta or mega-analytical approaches to identify associations that may exist in only defined subsets of patients. Our  
206 sample size of 190 metagenomic samples, while as large as some cohorts analyzed by lower taxonomic resolution methods such as

207 16S rRNA sequencing, was still limited. Additional multi-centre prospective studies are required to validate the associations identified  
208 in this analysis and their diagnostic or therapeutic utility.

209 **Conclusion**

210 Our study confirms previous findings suggesting that there are differences in the gut microbiome of R vs NR to ICI. Despite consistent  
211 bioinformatic analyses no species were found to be consistently differentially abundant between R/NR across data sets. However,  
212 using meta- and mega-analyses we identified five species that were concordantly differentially abundant between R and NR. Of these  
213 five organisms, *B. thetaiotaomicron* and *C. bolteae* were predictors of NR to ICI. These data suggest future clinical trials should assess  
214 the use of narrow spectrum anti-biotics targeting NR associated species.

215

216 **Acknowledgments**

217 The authors acknowledge and are grateful for the support of the Tomczyk AI and Microbiome Working Group. AH was supported by  
218 the Tomczyk AI and Microbiome Working Group and the Princess Margaret Cancer Foundation.

219 **Conflicts of Interest of Statement**

220 AAH, BC, PS, MW, VR, WX, BAC, have no conflicts to report. AS has received compensation from: Merck, Bristol-Myers Squibb,  
221 Novartis, Oncorus, Janssen; and grant/research support from: Novartis, Bristol-Myers Squibb, Symphogen AstraZeneca/Medimmune,  
222 Merck, Bayer, Surface Oncology, Northern Biologics, Janssen Oncology/Johnson & Johnson, Roche, Regeneron, Alkermes, Array  
223 Biopharma/Pfizer, GSK.

## 224 Literature cited

- 225 1. Vétizou, M. *et al.* Anticancer immunotherapy by CTLA-4 blockade relies on the gut  
226 microbiota. *Science (80-. )*. **350**, 1079–1084 (2015).
- 227 2. Frankel, A. E. *et al.* Metagenomic Shotgun Sequencing and Unbiased Metabolomic  
228 Profiling Identify Specific Human Gut Microbiota and Metabolites Associated with  
229 Immune Checkpoint Therapy Efficacy in Melanoma Patients. *Neoplasia (United States)*  
230 **19**, (2017).
- 231 3. Matson, V. *et al.* The commensal microbiome is associated with anti-PD-1 efficacy in  
232 metastatic melanoma patients. *Science (80-. )*. **359**, 104–108 (2018).
- 233 4. Gopalakrishnan, V. *et al.* Gut microbiome modulates response to anti-PD-1  
234 immunotherapy in melanoma patients. *Science (80-. )*. **359**, 97–103 (2018).
- 235 5. Routy, B. *et al.* Gut microbiome influences efficacy of PD-1-based immunotherapy  
236 against epithelial tumors. *Science (80-. )*. **359**, 91–97 (2018).
- 237 6. Mager, L. F. *et al.* Microbiome-derived inosine modulates response to checkpoint  
238 inhibitor immunotherapy. *Science (80-. )*. **369**, (2020).
- 239 7. Schwartz, L. H. *et al.* RECIST 1.1 - Update and clarification: From the RECIST  
240 committee. *Eur. J. Cancer* **62**, 132–137 (2016).
- 241 8. Andrews, S. FASTQC A Quality Control tool for High Throughput Sequence Data.  
242 *Babraham Inst.* (2015).
- 243 9. Ewels, P., Magnusson, M., Lundin, S. & Källér, M. MultiQC: Summarize analysis results  
244 for multiple tools and samples in a single report. *Bioinformatics* **32**, (2016).
- 245 10. Segata, N. *et al.* Metagenomic microbial community profiling using unique clade-specific  
246 marker genes. *Nat. Methods* **9**, (2012).
- 247 11. McMurdie, P. J. & Holmes, S. phyloseq: an R package for reproducible interactive  
248 analysis and graphics of microbiome census data. *PLoS One* **8**, e61217 (2013).
- 249 12. Wickham H. ggplot2: Elegant Graphics for Data Analysis. *Springer-Verlag New York*  
250 (2009). Available at: <https://cran.r-project.org/web/packages/ggplot2/citation.html>.
- 251 13. R Core Team. R: a language and environment for statistical computing. *R Foundation for*  
252 *Statistical Computing, Vienna, Austria.* (2013).
- 253 14. Chen, B. & Xu, W. Generalized estimating equation modeling on correlated microbiome  
254 sequencing data with longitudinal measures. *PLoS Comput. Biol.* **16**, e1008108 (2020).
- 255 15. Burke, D. L., Ensor, J. & Riley, R. D. Meta-analysis using individual participant data:  
256 one-stage and two-stage approaches, and why they may differ. *Stat. Med.* **36**, (2017).
- 257 16. Wirbel, J. *et al.* Meta-analysis of fecal metagenomes reveals global microbial signatures  
258 that are specific for colorectal cancer. *Nat. Med.* **25**, (2019).
- 259 17. Ho, N. T., Li, F., Wang, S. & Kuhn, L. MetamicrobiomeR: An R package for analysis of  
260 microbiome relative abundance data using zero-inflated beta GAMLSS and meta-analysis  
261 across studies using random effects models. *BMC Bioinformatics* **20**, (2019).
- 262 18. Wagner, B. D., Robertson, C. E. & Harris, J. K. Application of two-part statistics for  
263 comparison of sequence variant counts. *PLoS One* **6**, (2011).
- 264 19. Derosa, L. *et al.* Gut Bacteria Composition Drives Primary Resistance to Cancer  
265 Immunotherapy in Renal Cell Carcinoma Patients. *Eur. Urol.* **78**, (2020).
- 266 20. Araujo, D. V *et al.* Bugs as Drugs: The Role of Microbiome in Cancer Focusing on  
267 Immunotherapeutics. *Cancer Treat. Rev.* (2020).
- 268 21. Fluckiger, A. *et al.* Cross-reactivity between tumor MHC class I-restricted antigens and  
269 an enterococcal bacteriophage. *Science (80-. )*. **369**, (2020).

- 270 22. Suau, A. *et al.* Direct analysis of genes encoding 16S rRNA from complex communities  
271 reveals many novel molecular species within the human gut. *Appl. Environ. Microbiol.* **65**,  
272 (1999).
- 273 23. Godon, J. J., Zumstein, E., Dabert, P., Habouzit, F. & Moletta, R. Molecular microbial  
274 diversity of an anaerobic digester as determined by small-subunit rDNA sequence  
275 analysis. *Appl. Environ. Microbiol.* **63**, (1997).  
276
